# Supplementary material for: Effect of adsorption and substitutional B doping at different concentrations on the electronic and magnetic properties of a BeO monolayer: a first-principles study
Source: Royal Society of Chemistry journal article supplement (doi:10.1039/d1cp03196a), 2021-01-01
Supplement: d1cp03196a1.pdf [file d1cp03196a1.pdf]

## Supporting Information (SI)

### **Effect of adsorption and substitutional B doping at different concentrations on the electronic and magnetic properties of BeO monolayer: A First-principles study**

A. Bafekry,<sup>1, \*</sup> M. Faraji,<sup>2</sup> M. M. Fadlallah,<sup>3</sup> D. M. Hoat,<sup>4, 5</sup> A. Bagheri Khatibani,<sup>6</sup> I. Abdolhosseini Sarsari,<sup>7</sup> and M. Ghergherehchi<sup>8, †</sup>

<sup>1</sup> Department of Physics, University of Antwerp, Groenenborgerlaan 171, B-2020 Antwerp, Belgium.

<sup>2</sup> TOBB University of Economics and Technology, Sogutozu Caddesi No 43 Sogutozu, 06560, Ankara, Turkey.

<sup>3</sup> Department of Physics, Faculty of Science, Benha University, 13518 Benha, Egypt.

<sup>4</sup> Institute of Theoretical and Applied Research, Duy Tan University, Ha Noi 100000, Viet Nam.

<sup>5</sup> Faculty of Natural Sciences, Duy Tan University, Da Nang 550000, Viet Nam.

<sup>6</sup> Nano Research Lab, Lahijan Branch, Islamic Azad University, Lahijan, Iran.

<sup>7</sup> Department of Physics, Isfahan University of Technology, Isfahan, 84156-83111, Iran.

<sup>8</sup> College of Electronic and Electrical Engineering, Sungkyunkwan University, Suwon, Korea.

\* To whom correspondence should be addressed.

[bafekry.asad@gmail.com](mailto:bafekry.asad@gmail.com) and [mitragh@skku.edu](mailto:mitragh@skku.edu)

### Computational details for optical properties calculations:

In the random phase approximation, the imaginary part of the interband dielectric permittivity is given by [1]:

$$\text{Im}\epsilon_{\alpha\beta}(\omega) = \frac{4\pi^2 e^2}{\Omega} \lim_{q \rightarrow 0} \frac{1}{|q|^2} \sum_{c,v,k} 2w_k \delta(\epsilon_{ck} - \epsilon_{vk} - \omega) \times \langle u_{c\mathbf{k}+e_{\alpha}q} \vee u_{v\mathbf{k}} \rangle \langle u_{c\mathbf{k}+e_{\beta}q} \vee u_{v\mathbf{k}} \rangle \quad (1)$$

where  $q$  is the Bloch vector of the incident wave,  $w_k$  is the  $\mathbf{k}$ -point weight and the band indices  $c$  and  $v$  are restricted to the conduction and the valence band states, respectively. By using the  $\text{Im}\epsilon_{\alpha\beta}(\omega)$ , one can

determine the corresponding real part via the Kramers–Kronig relations:

$$\frac{\omega'^2 - \omega^2 + i\eta}{\omega' \text{Im}\epsilon_{\alpha\beta}(\omega')} \quad (2)$$

$$\text{Re}\epsilon_{\alpha\beta}(\omega) = 1 + \frac{2}{\pi} P \int$$

where  $P$  denotes the principle value and  $\eta$  is the complex shift.

The adsorption coefficient determined as:

$$a_{\alpha\beta}(\omega) = \frac{2\omega k_{\alpha\beta}(\omega)}{c} \quad (3)$$

where  $k_{\alpha\beta}$  is imaginary part of the complex refractive index and  $c$  is the speed of light in vacuum, known as the extinction index. It is given by the following relations

$$k_{\alpha\beta}(\omega) = \sqrt{\frac{|\epsilon_{\alpha\beta}(\omega) - \text{Re}\epsilon_{\alpha\beta}(\omega)|}{2}} \quad (4)$$

The reflectivity is given by

$$\frac{n^2 - k^2}{n^2 + k^2} \quad (5)$$

$$R_{ij}(\omega) =$$

where  $n$  and  $k$  are real and imaginary parts of the complex refractive index, which are known as the refractive index and the extinction index, respectively.

\*To whom correspondence should be addressed.  
[bafekry.asad@gmail.com](mailto:bafekry.asad@gmail.com) and [mitragh@skku.edu](mailto:mitragh@skku.edu)

References

[1] F. Wooten, **Optical Properties of Solids**, Academic press (2013).

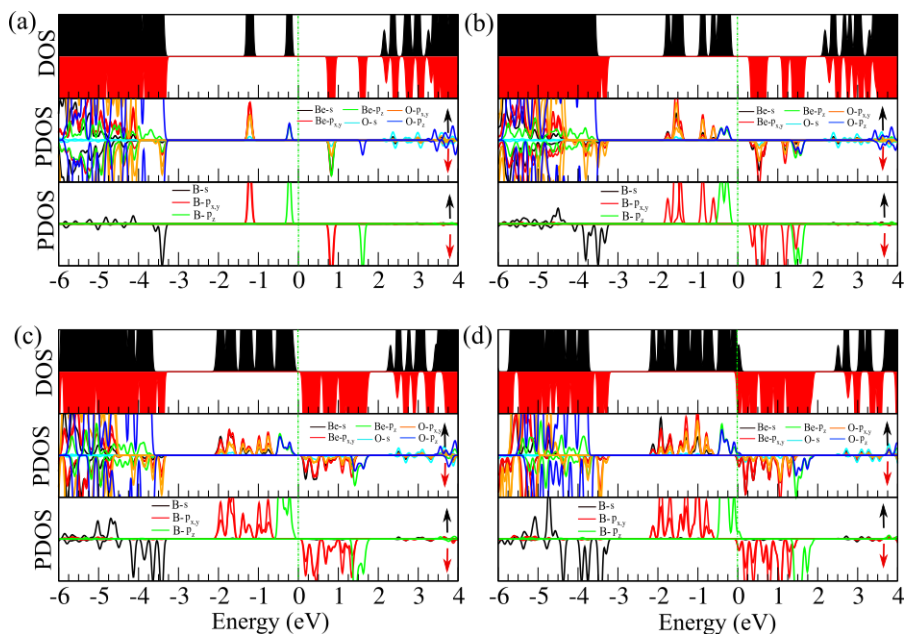

Figure S1. DOS and PDOS of B adsorbed BeO monolayer for different concentrations. The zero of energy is at Fermi-level.

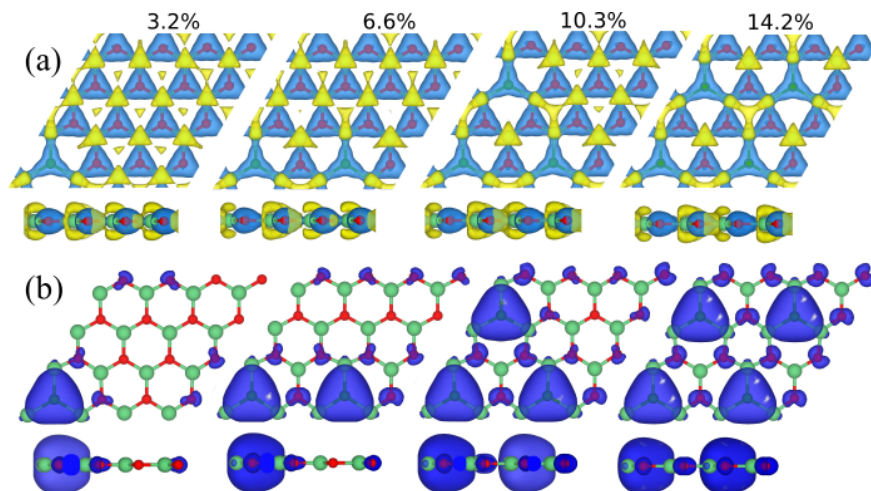

Figure S2. Difference charge and (b) difference spin densities of B doped BeO monolayer for different concentrations. Red (blue) color indicate high (low) electron density.

\*To whom correspondence should be addressed.  
[bafekry.asad@gmail.com](mailto:bafekry.asad@gmail.com) and [mitragh@skku.edu](mailto:mitragh@skku.edu)
